# Supplementary material for: An Inversion of NO x and NMVOC Emissions using Satellite Observations during the KORUS-AQ Campaign and Implications for Surface Ozone over East Asia
Source: Copernicus journal article supplement (doi:10.5194/acp-2020-220), 2020-03-31
Supplement: Supplementary file 1 [file acp-2020-220-supplement.pdf]

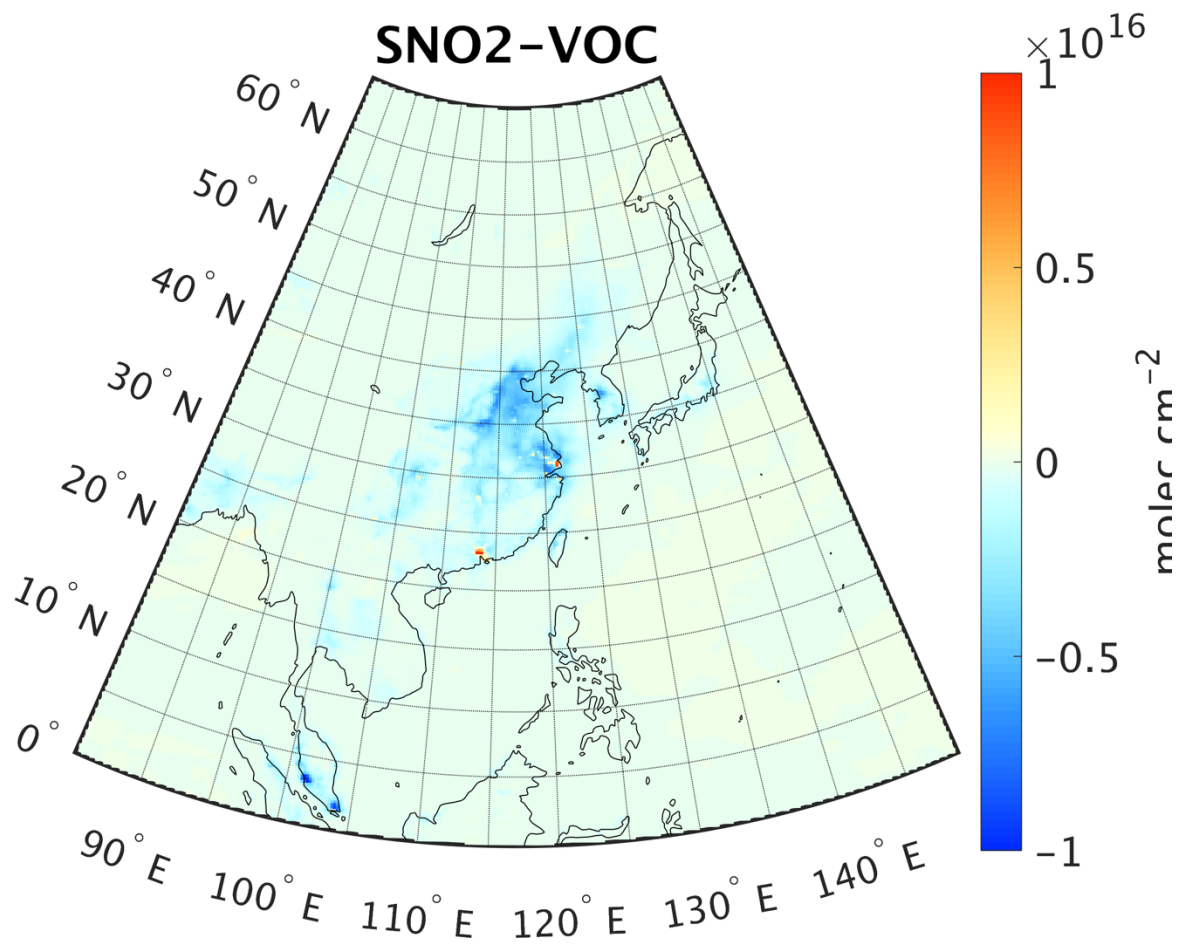

Figure S1. The sensitivity of tropospheric NO<sub>2</sub> columns to VOC emission estimated by CMAQ-DDM over May-June 2016 at 1:30 local time.

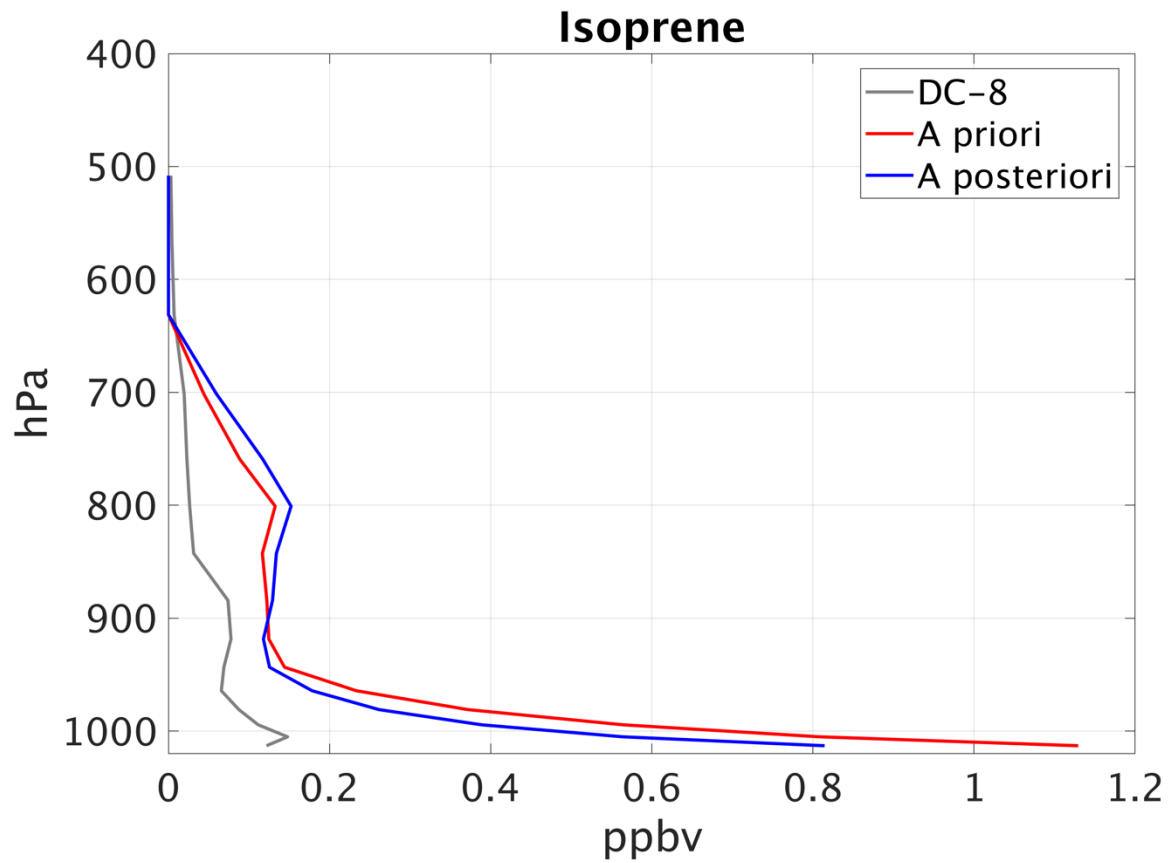

Figure S2. Comparison of the simulated model using the prior/posterior emissions and DC-8 measurements in terms of isoprene.

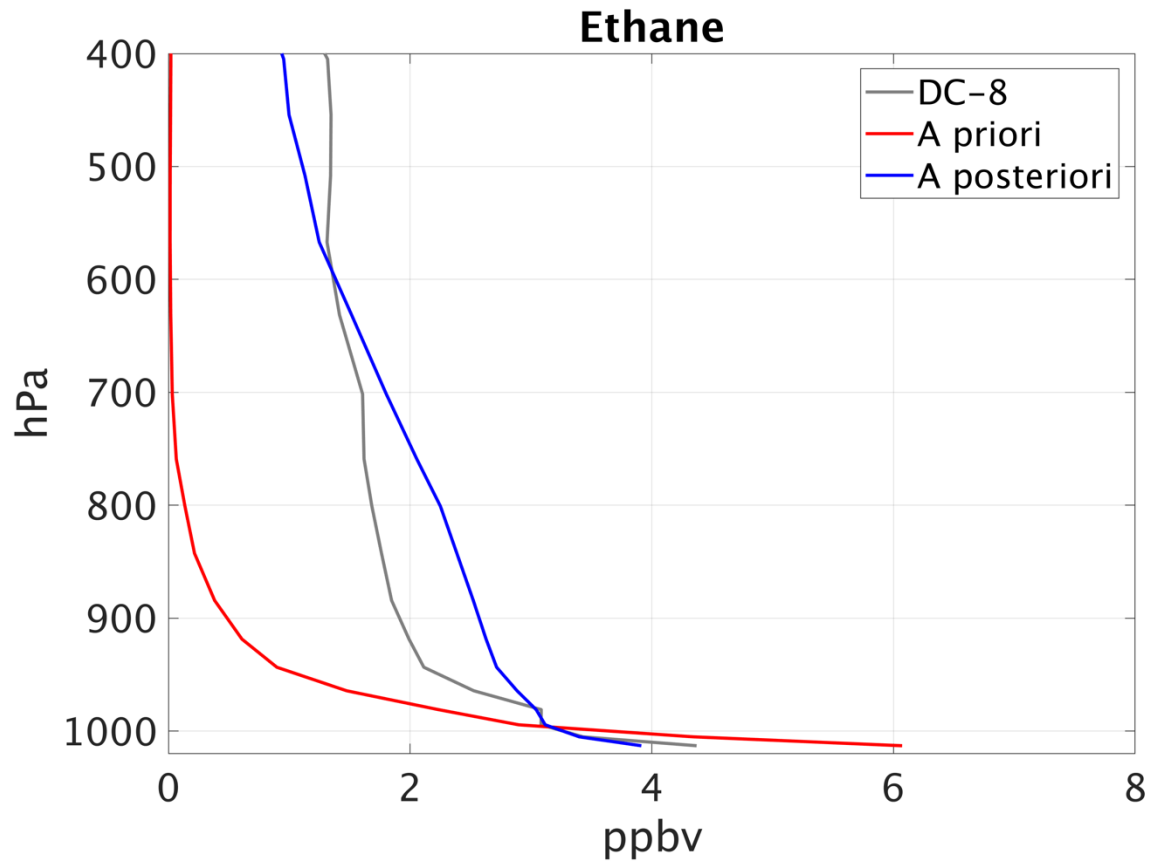

Figure S3. Comparison of the simulated model using the prior/posterior emissions and DC-8 measurements in terms of ethane.

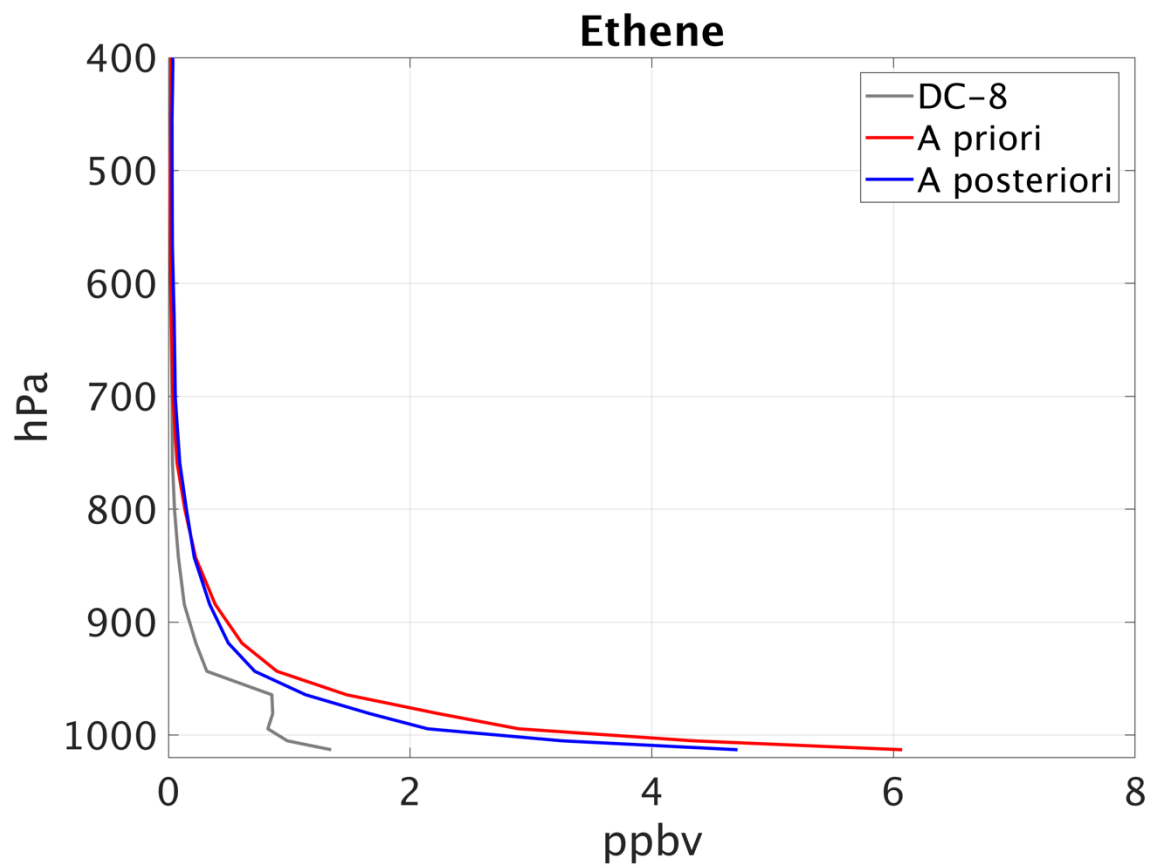

Figure S4. Comparison of the simulated model using the prior/posterior emissions and DC-8 measurements in terms of ethene.

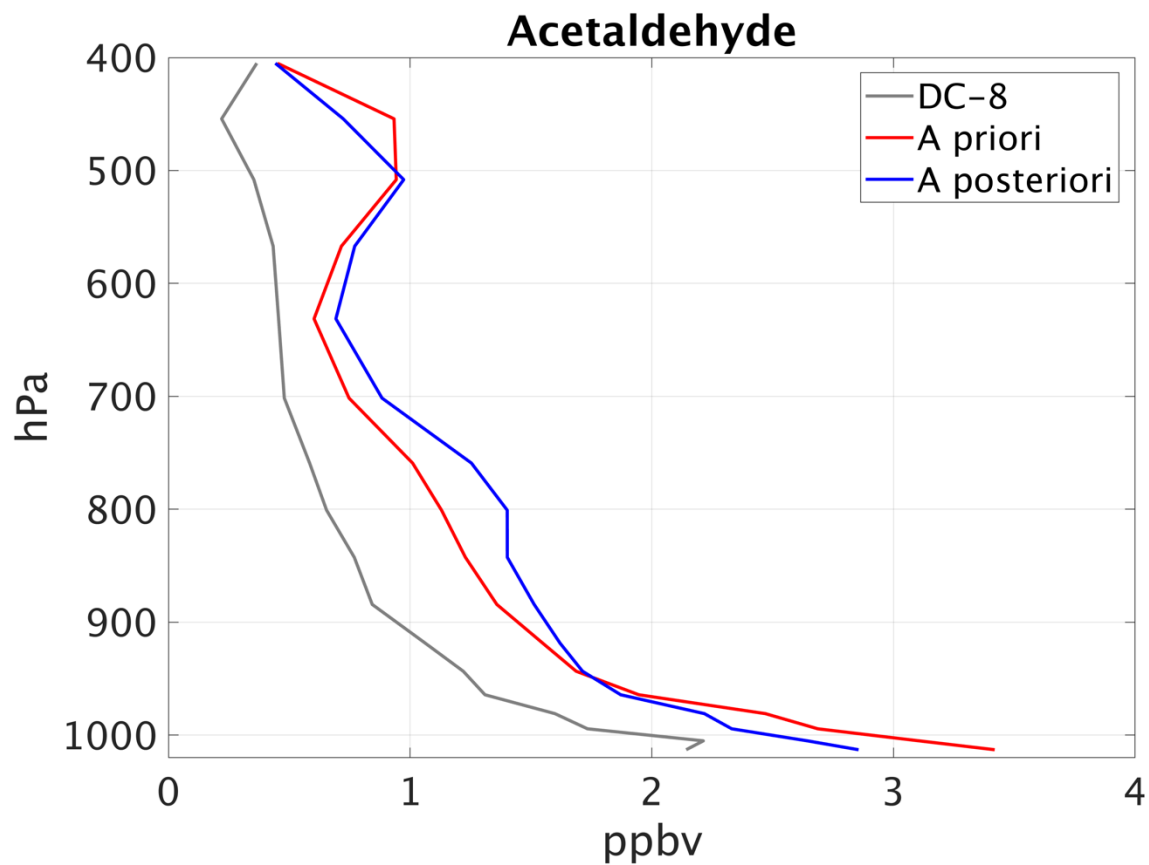

Figure S5. Comparison of the simulated model using the prior/posterior emissions and DC-8 measurements in terms of acetaldehyde.

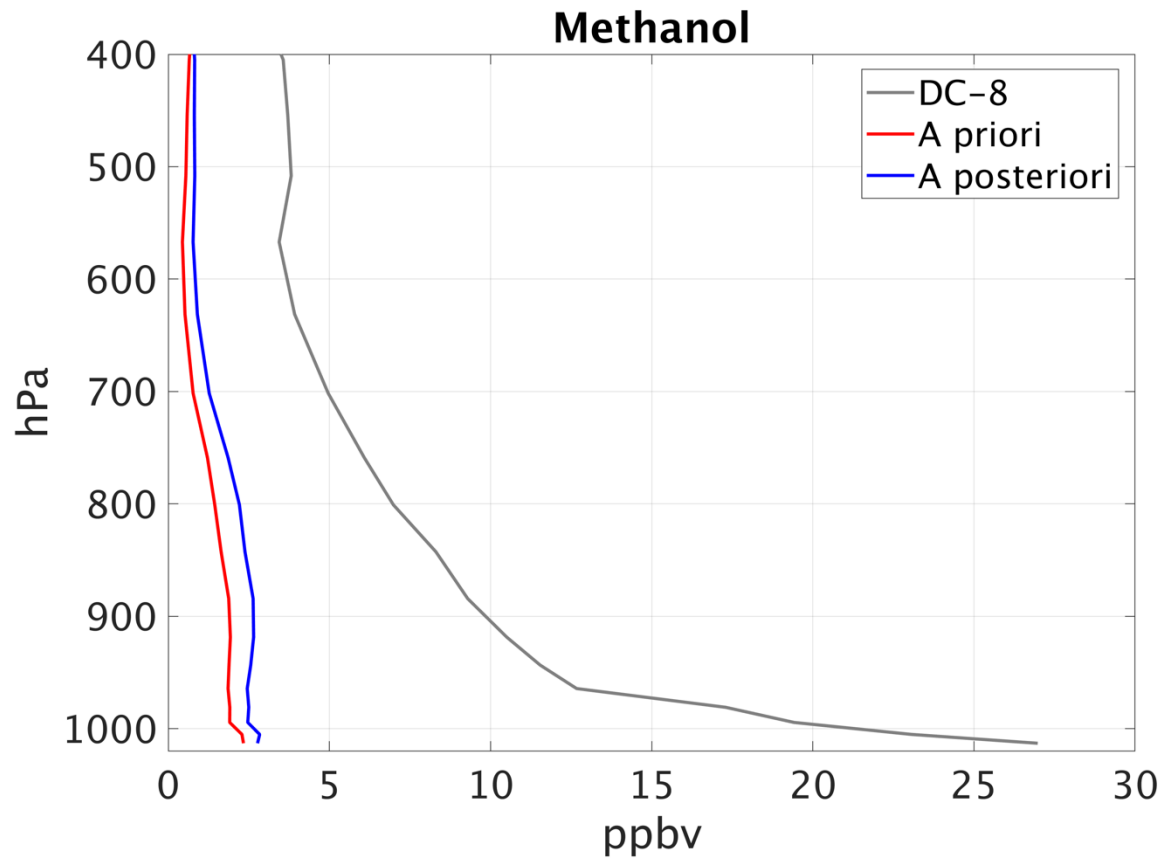

Figure S6. Comparison of the simulated model using the prior/posterior emissions and DC-8 measurements in terms of methanol.

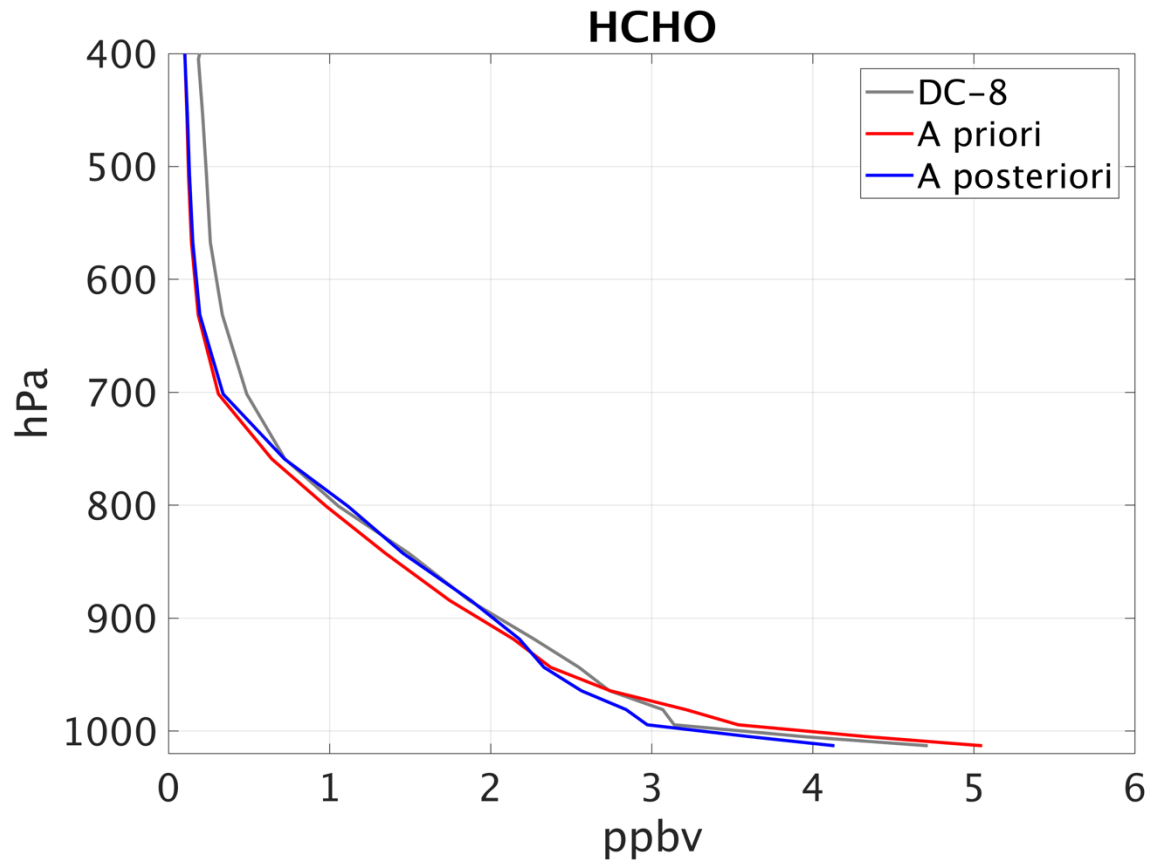

Figure S7. Comparison of the simulated model using the prior/posterior emissions and DC-8 measurements in terms of HCHO.

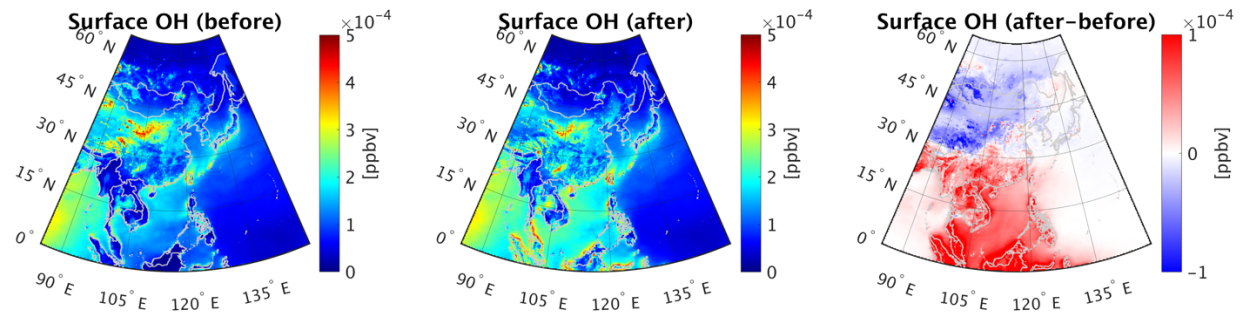

Figure S8. The simulations of surface OH before and after the inversion at 1200-1600 CST.

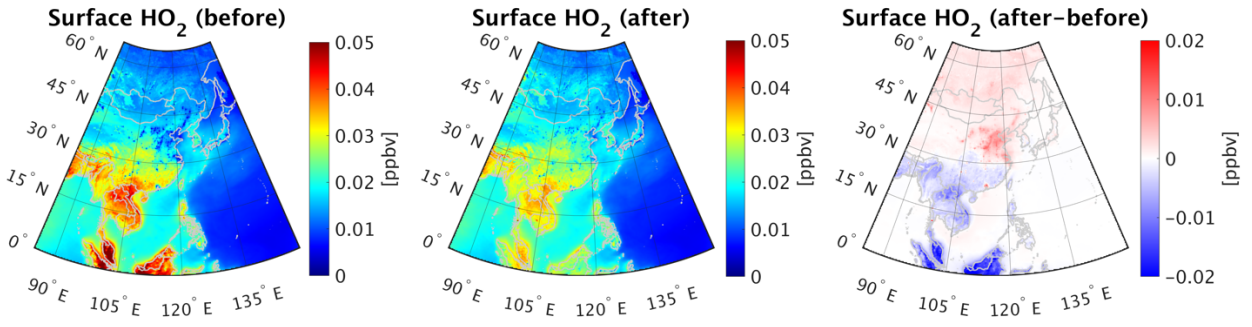

Figure S9. The simulations of surface HO<sub>2</sub> before and after the inversion at 1200-1600 CST.
